# Supplementary material
Source: PubMed Central journal article supplement (PMC5816174)
Supplement: pnas.1716469115.sapp.pdf [file pnas.1716469115.sapp.pdf]

**Mathematical modelling of the O<sub>2</sub> level in the brain parenchyma.** The model consists of a single compartment representing the brain parenchyma. This compartment possesses an influx/efflux rate of O<sub>2</sub> with a fixed permeability constant (k<sub>1</sub>), simulating the O<sub>2</sub> diffusion from blood vessels to the brain parenchyma. The O<sub>2</sub> inside the compartment is consumed by neurons (VO<sub>2 neu</sub>) and astrocytes (VO<sub>2 ast</sub>) respectively, and computed as:

$$VO_{2 \text{ neu}} = \frac{V_N}{K_m + O_2^{\text{in}}} \quad \text{and} \quad VO_{2 \text{ ast}} = \frac{V_A}{K_m + O_2^{\text{in}}}$$

The V<sub>N</sub> and V<sub>A</sub> constants were computed as:

$$V_N + V_A = CMRO_2^{\text{Brain}}$$

$$V_N = CMRO_2^{\text{Brain}} * 0.7$$

$$V_A = CMRO_2^{\text{Brain}} - V_N$$

CMRO<sub>2</sub><sup>Brain</sup> correspond to the cerebral metabolic rate for O<sub>2</sub> of the total brain. Neurons and astrocytes were assumed to consume 70% and 30% of tissue oxygen (33–36). The O<sub>2</sub> level inside the compartment (O<sub>2</sub><sup>in</sup>) was computed with the following differential equation:

$$\frac{dO_2^{\text{in}}}{dt} = k_1(O_2^{\text{out}} - O_2^{\text{in}}) - \frac{(V_N + V_A)O_2^{\text{in}}}{K_m + O_2^{\text{in}}}$$

The simulations were carried out with the constants O<sub>2</sub><sup>out</sup> = 150 μM, k<sub>1</sub> = 0.3142 s<sup>-1</sup>, K<sub>m</sub> = 1 μM (52) and CMRO<sub>2</sub><sup>Brain</sup> = 38.961 μM/s (1.8 μmol\*g<sup>-1</sup>\*min<sup>-1</sup>). For a simulation of an increase in neuronal O<sub>2</sub> consumption, VO<sub>2 neu</sub> was increased by 0-100%. For simulation of astrocytic O<sub>2</sub> consumption decrease, VO<sub>2 ast</sub> was decreased by 0-40%. The differential

equation was solved by numerical integration with the Rosenbrock method using Berkeley Madonna. The results obtained were expressed as  $O_2^{\text{in}}$  concentration (in  $\mu\text{M}$ ) or  $\Delta O_2$  ( $O_2^{\text{in}}$  before  $V_N$  increase -  $O_2^{\text{in}}$  at 1 s of  $V_N$  increase).

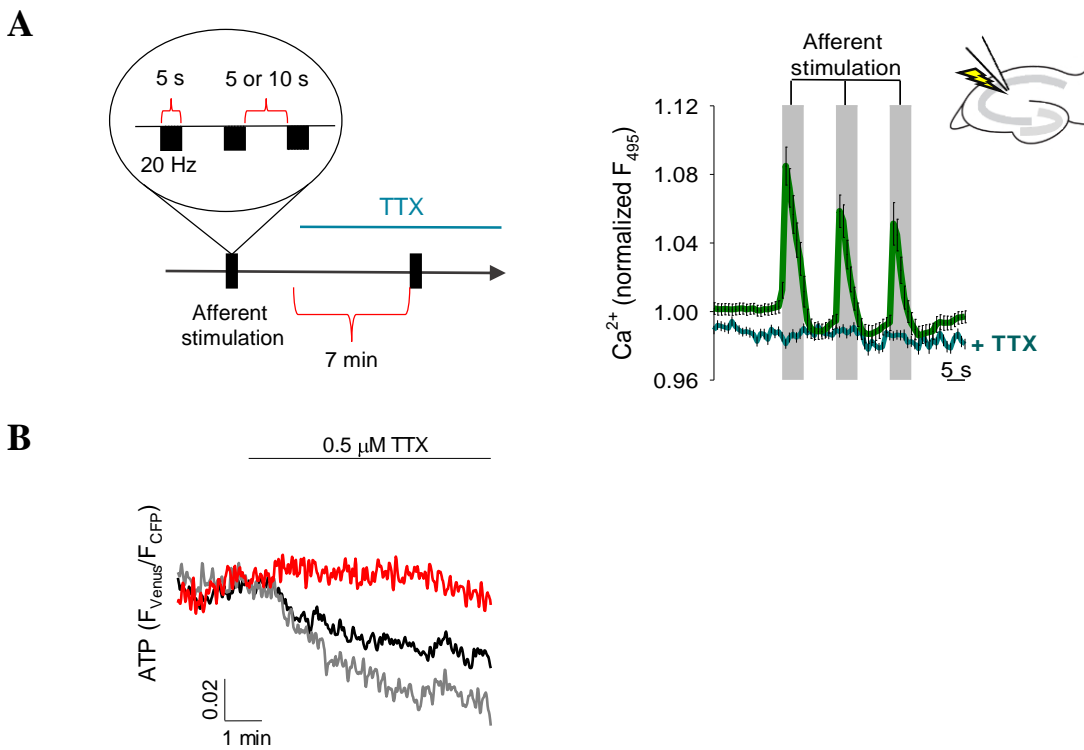

**Figure S1. TTX-sensitive neuronal Ca<sup>2+</sup> transients evoked by afferent stimulation and TTX-induced effects on astrocytic ATP.**

(A) Left, protocol for neuronal afferent stimulation, with 3 bursts of 5 s at 20 Hz, in the absence or presence of 0.5 μM tetrodotoxin (TTX). Right, Ca<sup>2+</sup> response of CA1 cells in organotypic hippocampal slices monitored with Fluo-4 during Schaeffer collateral stimulation with the protocol described on the left. (n=3 slices, 48 cells). (B) Single-cell traces of astrocytic ATP response to TTX (0.5 μM).

**A**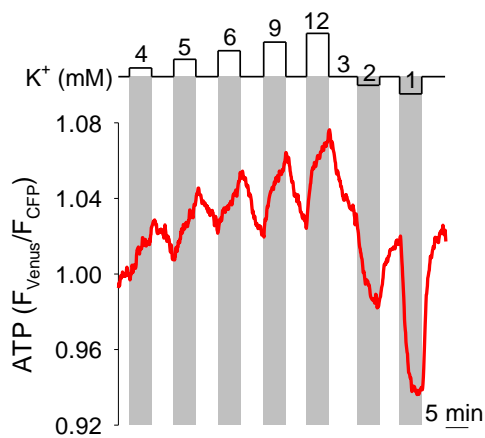**B**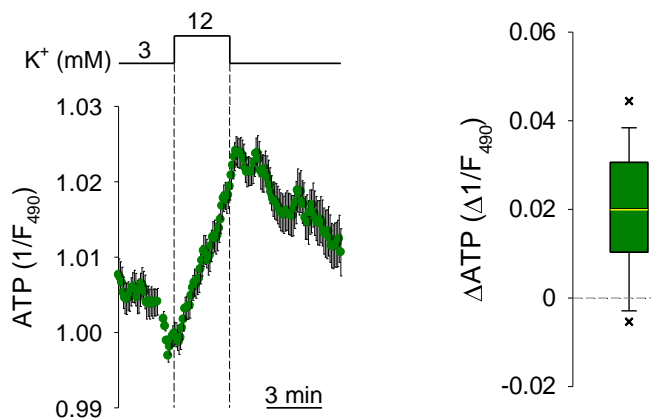

**Figure S2. Further characterization of the astrocytic ATP response to [K<sup>+</sup>]<sub>e</sub>.**

(A) Behavior of an astrocyte expressing ATeam during the indicated increases and decreases in extracellular K<sup>+</sup> concentration. Representative from 24 cells in 3 independent experiments. (B) Effect of 12 mM K<sup>+</sup> on astrocytic ATP as monitored with the fluorescent probe Mg-green, 1/F<sub>490</sub> is the reciprocal value of fluorescence intensity of the dye excited at 490 nm (n=6, 62 cells).

**A**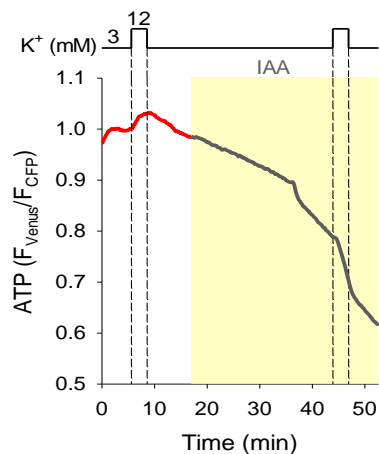**B**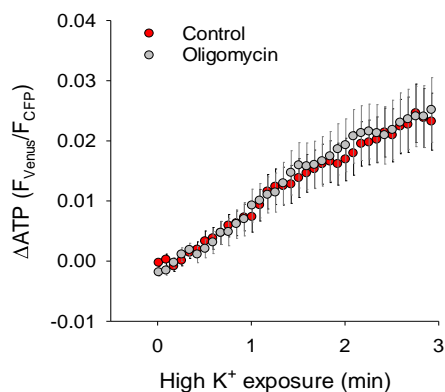**C**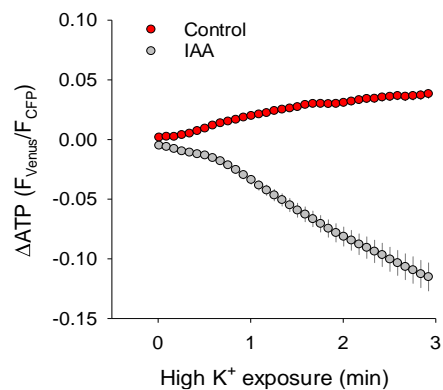

**Figure S3. Glycolytic origin of the K<sup>+</sup>-induced ATP rise.**

(A) ATP response in a single cell to 12 mM extracellular K<sup>+</sup> exposure, before and during inhibition of glycolysis with 500 μM iodoacetic acid (IAA). (B-C) Summary of the ATP response during high K<sup>+</sup> exposure, in the absence (red) or presence (grey) of 2.5 μM oligomycin (right; n=3, 19 cells) or 500 μM IAA (left; n=3, 25 cells).

**A**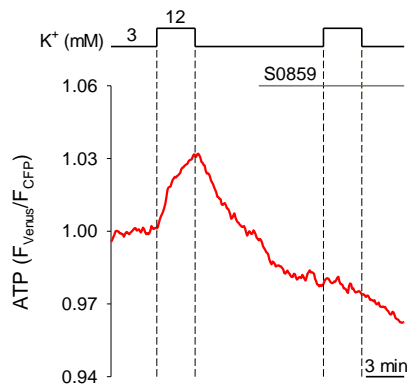**B**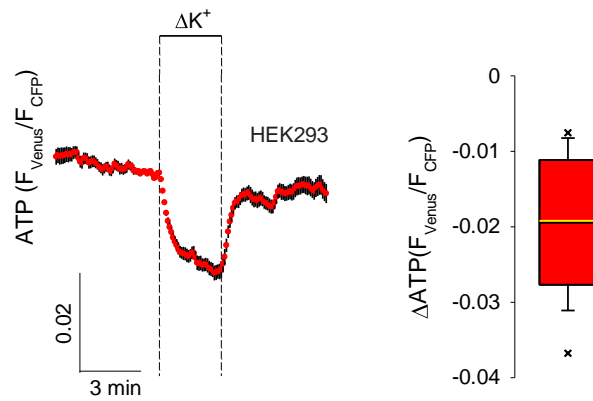

**Figure S4. Further characterization of NBCe1 involvement on the  $K^+$ -induced ATP rise.**

(A) Single astrocyte ATP response to 12 mM extracellular  $K^+$ , before and during inhibition of the NBCe1 activity with 30  $\mu\text{M}$  S0859. Representative of 23 cells in 3 independent experiments. (B) ATP monitoring in HEK293 cells expressing ATeam 1.03 during an increase in extracellular  $K^+$  ( $\Delta K^+$ ; from 1 to 5 mM extracellular  $K^+$ ). Baseline  $[K^+]_e$  was set to 1 mM to desaturate the  $\text{Na}^+/\text{K}^+$  ATPase. Right, ATP response to 3 min exposure to  $\Delta K^+$  ( $n=4$ , 37 cells).

A

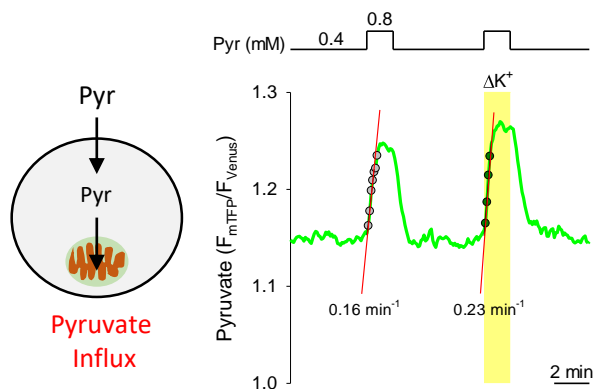

B

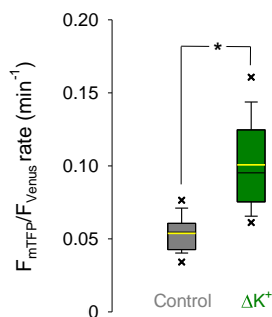

C

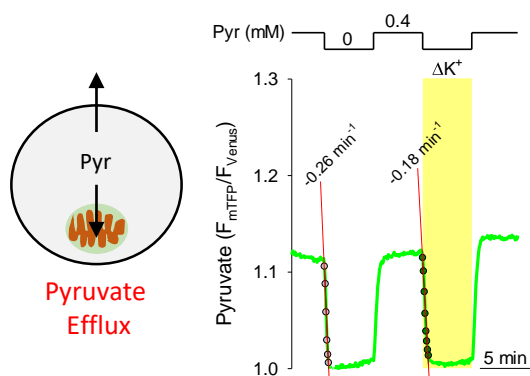

D

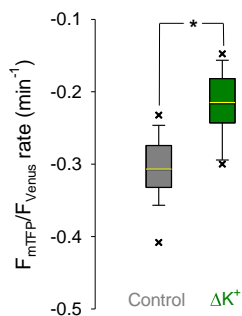

### Figure S5. Reduced intracellular pyruvate metabolism in response to high $[K^+]_e$ .

(A) Left, protocol to assess pyruvate influx. Right, Single cell response to an increase in extracellular pyruvate, before and during exposure to  $12 \text{ mM K}^+$ . (B) Summary of the computed pyruvate increase rate from similar experiments to (A), before and during exposure to  $12 \text{ mM K}^+$  ( $n=3$ , 25 cells). (C) Left, protocol to assess pyruvate efflux. Right, Single cell response to extracellular pyruvate withdrawal, before and during exposure to  $12 \text{ mM K}^+$ . (D) Summary of the computed pyruvate decrease rate from similar experiments to (G), before and during exposure to  $12 \text{ mM K}^+$  ( $n=4$ , 28 cells).

**A**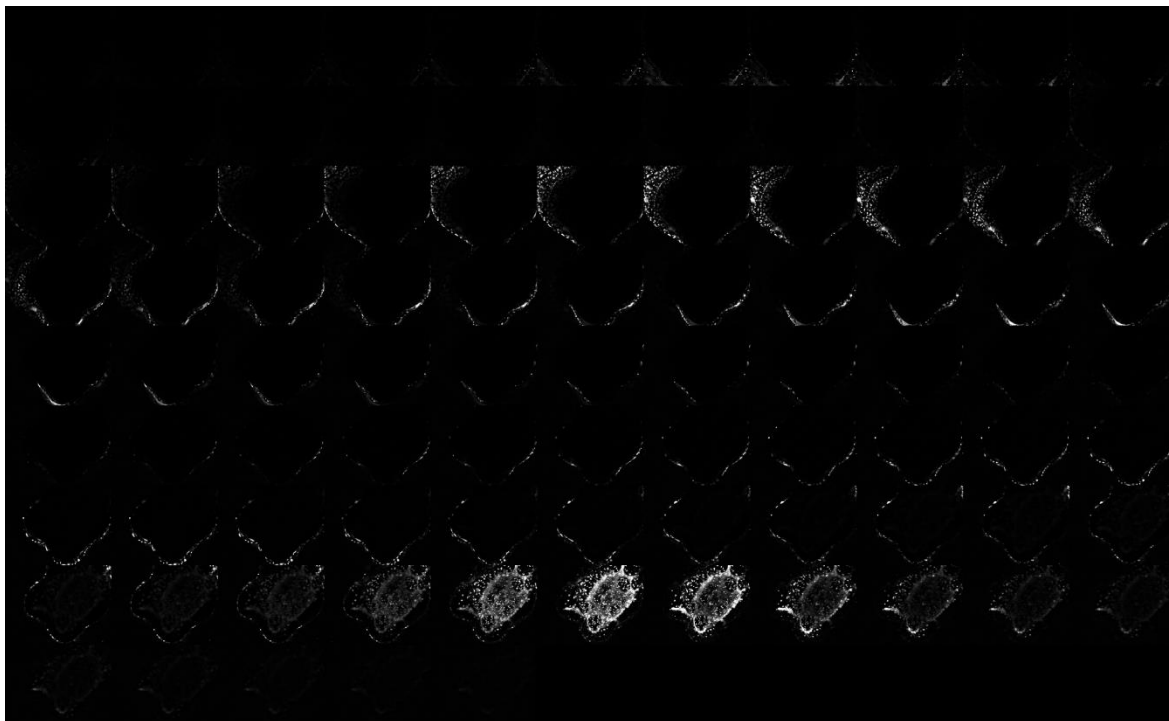**B**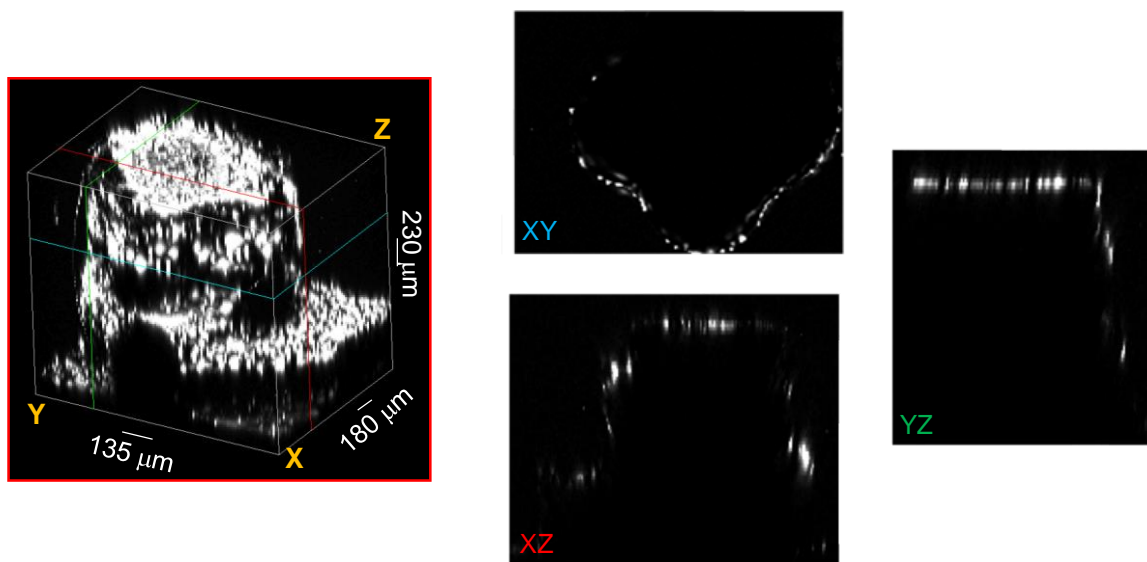

**Figure S6. 3D confocal imaging of a high-surface coverslip seeded with astrocytes.**

Astrocytes growing on a 3D-printed coverslip were visualized by BCECF staining and imaged by confocal microscopy. **(A)** Montage of the Z-stack images of one of the twenty one columns of the coverslip. Images were captured every 20 μm along the Z-axis. **(B)** 3D reconstruction of the column. The XZ, XY, and YZ planes were obtained at the coordinates indicated inside the reconstruction by red, cyan and green lines.



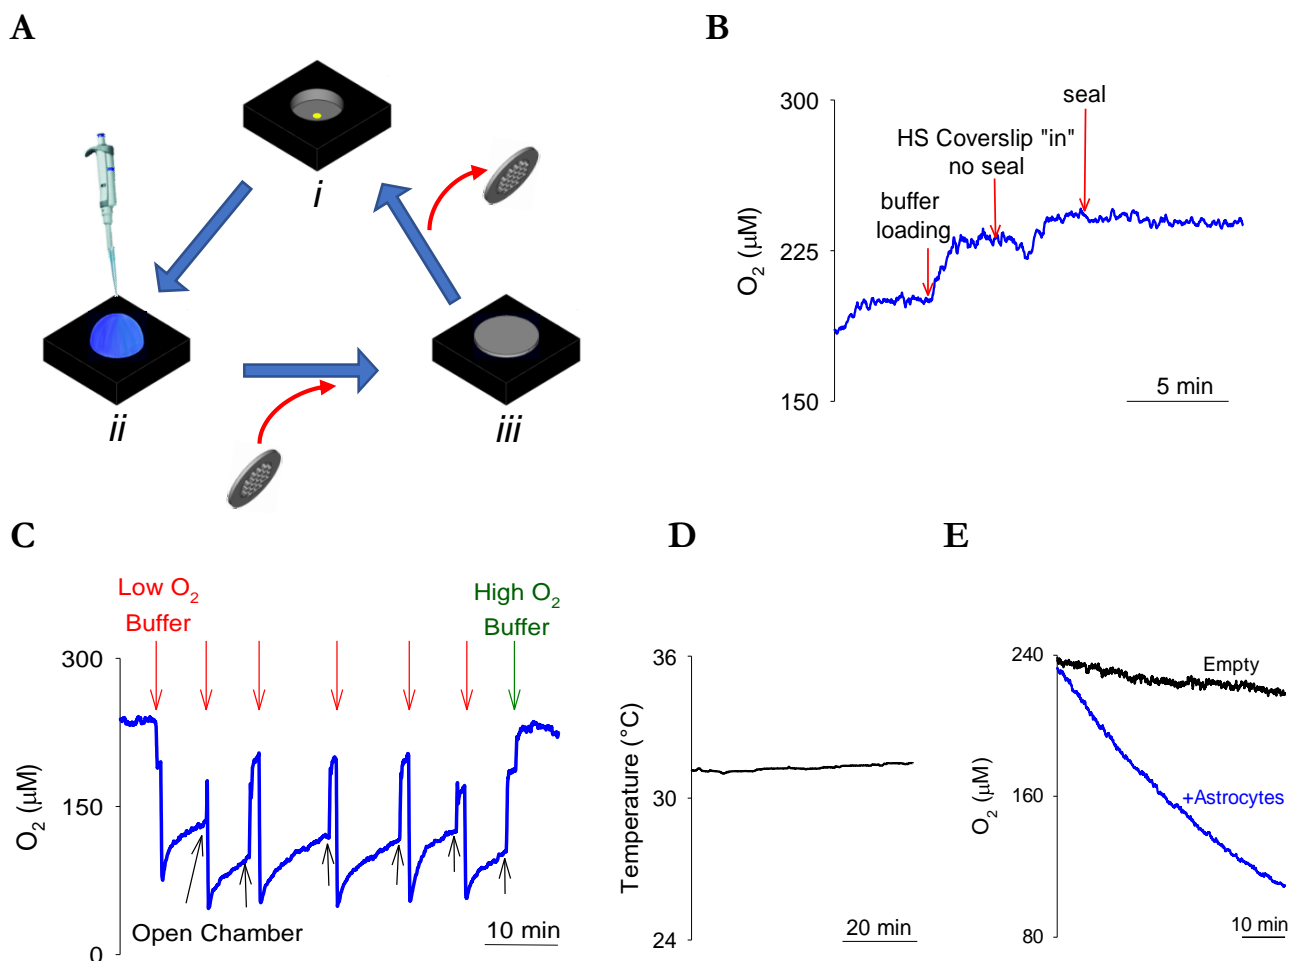

**Figure S7. Validation of the method to measure oxygen consumption by adherent cells.**

(A) Measurement cycle of the custom-made high-surface (HS) respirometry device. i. dry chamber, exposed to air. ii. buffer-loaded chamber, exposed to air. iii. Sealing of the chamber with a HS coverslip. Removal of coverslip and buffer returns to point i, allowing multiple determinations in the same cells. Calibration is performed between steps i and ii, whereas  $O_2$  consumption is quantitated in step iii. (B) Oxygen concentration during the measurement cycle described in (A) using an empty coverslip. (C) Reproducibility of oxygen measurement throughout sealing/opening cycles, using an empty coverslip. Red arrows indicate loading of the chamber with a low oxygen buffer (previously bubbled with 95%  $N_2$ /5%  $CO_2$ ), immediately followed by sealing. The green arrow indicates loading of the chamber with a buffer previously equilibrated in high oxygen (95% air/5%  $CO_2$ ), immediately followed by sealing. Black arrows indicates opening of the chamber. (D) Temperature inside the chamber during the recording show in (C). (E) Oxygen concentration recording using either a coverslip cultured with astrocytes (blue) or an empty coverslip (black).

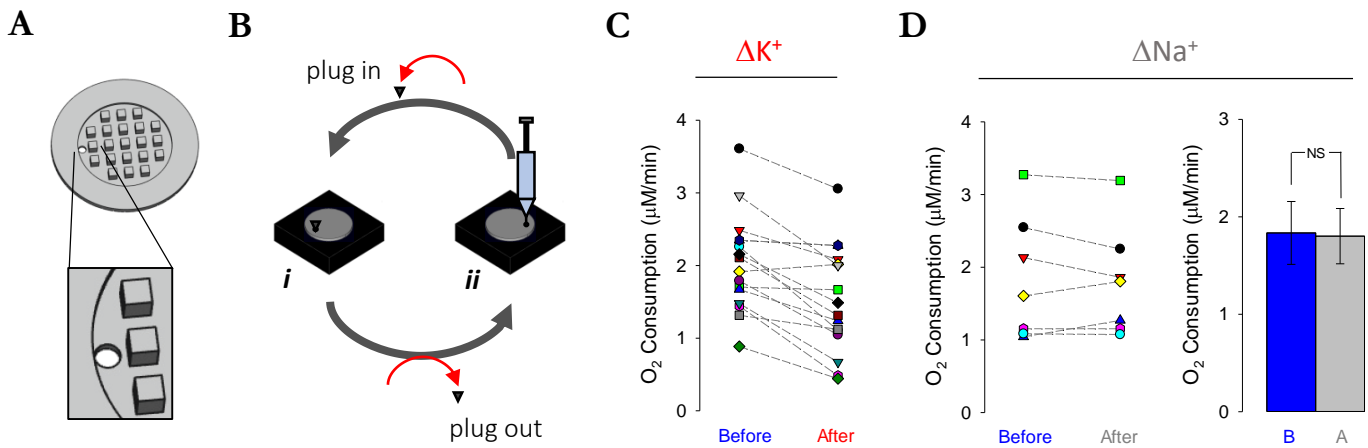

**Figure S8. Protocol to test for acute modulation of oxygen consumption.**

(A) Rendered image of the high-surface (HS) coverslip used for acute increase of extracellular  $K^+$  by KCl injection. (B) Scheme of the acute injection of KCl. *i*. Oxygen level is recorded with the coverslip sealed and the injection port is occluded with a plastic plug. *ii*. The plug is released and KCl injected. After injection the plug is fitted again in the coverslip. (C) Oxygen consumption rates estimated before and after 1 M KCl injection, increasing  $[K^+]_e$  inside the chamber to  $\sim 12$  mM ( $n=15$ , from Fig 2H). (D) Oxygen consumption obtained before and after 1 M NaCl injection.  $n=7$ .

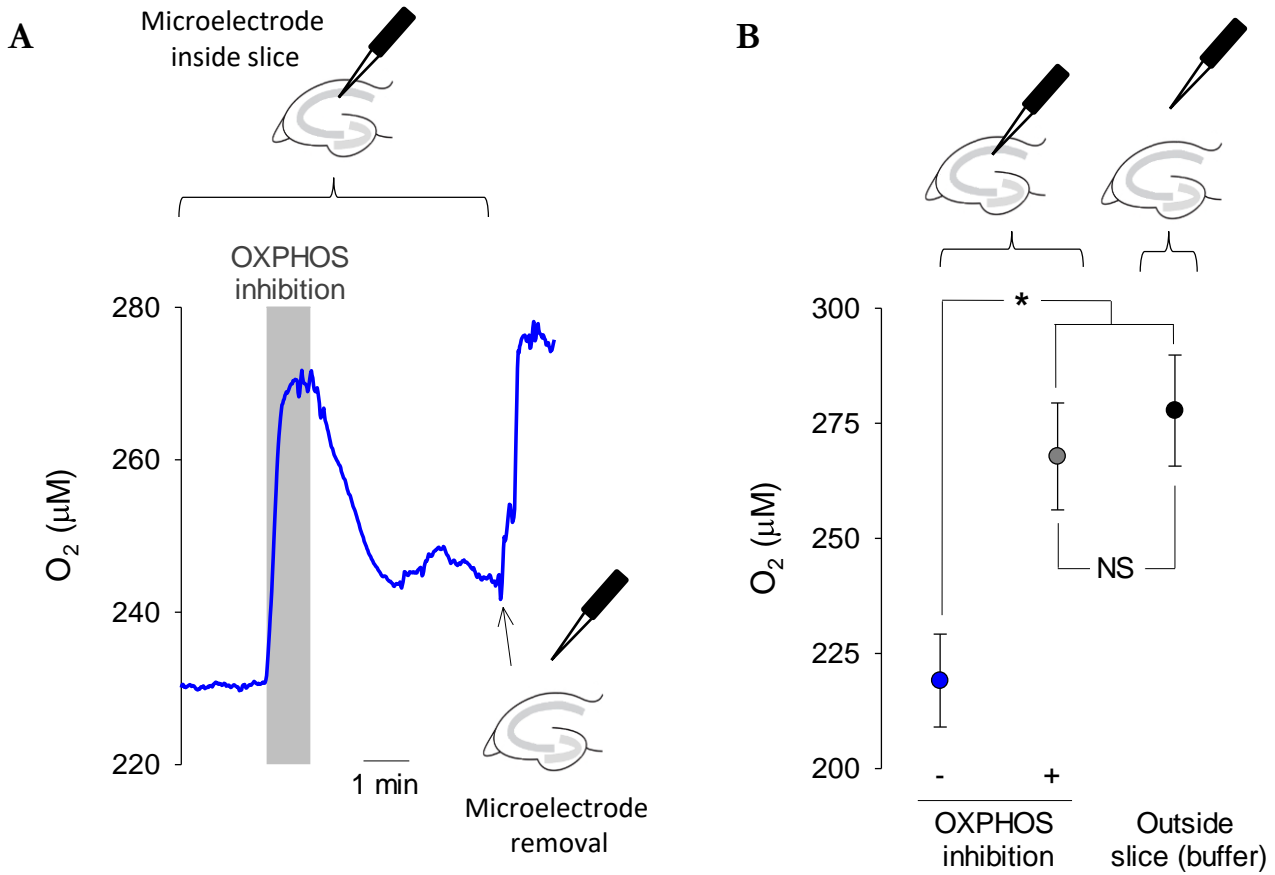

**Figure S9. Validation of the method to measure oxygen level in hippocampal tissue.**

(A) Oxygen concentration inside a single hippocampus slice was measured with a microelectrode, during OXPHOS inhibition with 5 mM sodium azide. After this, the microelectrode is removed from the slice to measure the oxygen concentration in the extracellular buffer (outside). (B) Summary of the O<sub>2</sub> changes induced by OXPHOS inhibition and removal of the microelectrode from 6 similar experiments to (A).

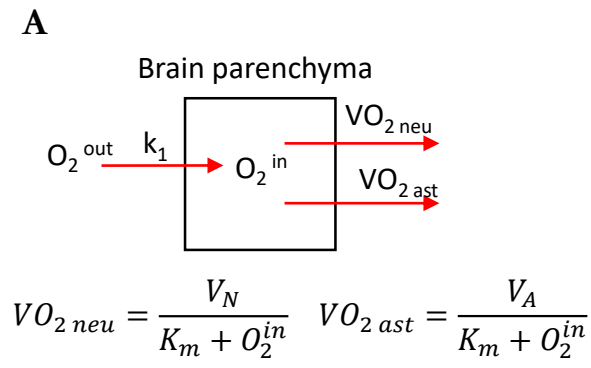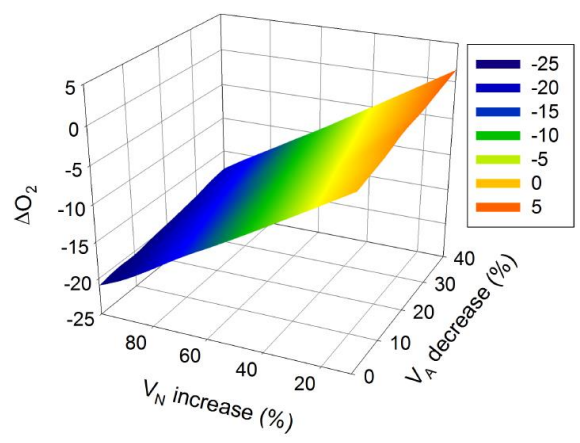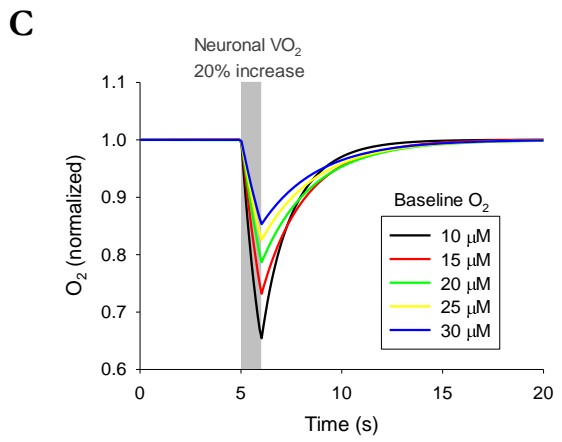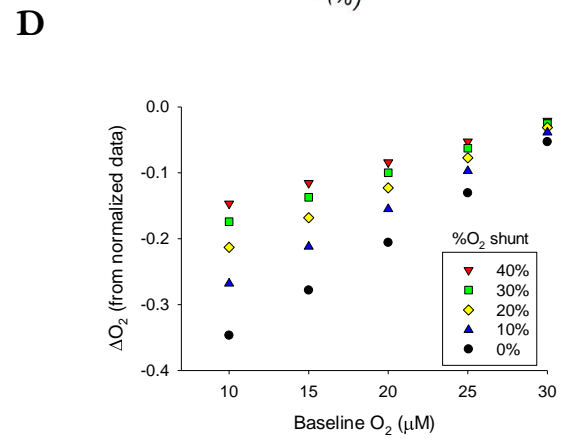

**Figure S10. Compartmental modeling of oxygen dynamics with two competing oxygen sinks.** (A) Model of brain oxygen dynamics (see parameter values in SI text). (B)  $\Delta O_2$  induced by  $V_N$  increase (0-100%) at different  $V_A$  decreases (0-40%) with  $V_N / (V_N + V_A) = 0.7$ . (C) Tissue oxygen during a 20% increase in neuronal oxygen consumption ( $VO_2$ ), with astrocytic  $VO_2$  unchanged, at different baseline  $O_2$  concentrations from 10 to 30  $\mu\text{M}$ . (D) Magnitude of the oxygen dip induced by a 20% increase in neuronal  $VO_2$  at increasing intensities of the astrocyte-to-neuron oxygen shunt.
